# Supplementary material
Source: Springer Nature journal article supplement (https://www.springermedizin.de/resource/supplementary/13012_2011_487_MOESM1_ESM.pdf/9630130)
Supplement: MOESM1 [file 9630130]

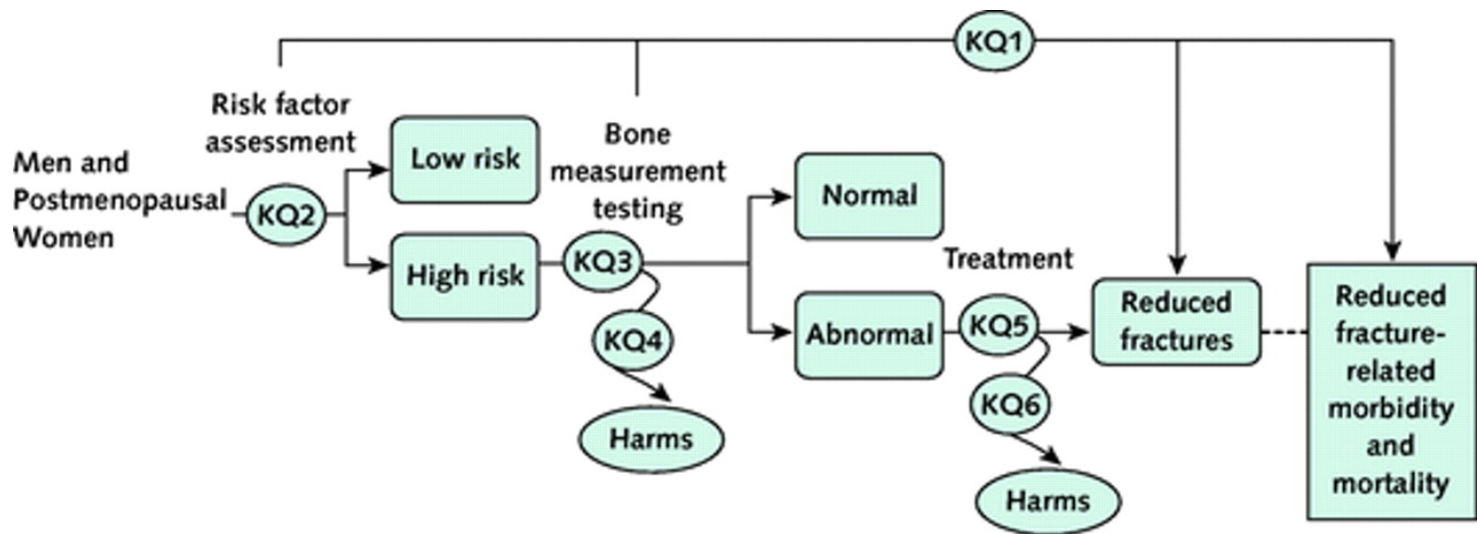

From *Screening for Osteoporosis: An Update for the U.S. Preventive Services Task Force*. Authors: Nelson HD, Haney EM, Dana T, Bougatsos C, Chou R. published in *Annals of Internal Medicine*, July 5, 2010. Reprinted with permission.
